# Supplementary material for: Pharmaceutical cocrystals of naringenin with improved dissolution performance
Source: Royal Society of Chemistry journal article supplement (doi:10.1039/c8ce00341f), 2018-01-01
Supplement: c8ce00341f1.pdf [file c8ce00341f1.pdf]

Supporting Information

**Pharmaceutical Cocrystals of Naringenin with Improved  
Dissolution Performance**

Chun Luo <sup>a,b</sup>, Wendong Liang <sup>a</sup>, Xin Chen <sup>b</sup>, Jianming Wang <sup>c</sup>, Zongwu Deng <sup>b</sup>, Hailu Zhang <sup>b,\*</sup>

<sup>a</sup> *College of Chemistry and Chemical Engineering, Wuhan University of Science and Technology, Wuhan 430081, People's Republic of China.*

<sup>b</sup> *Laboratory of Magnetic Resonance Spectroscopy and Imaging, Suzhou Institute of Nano-tech and Nano-bionics, Chinese Academy of Sciences, Suzhou 215123, People's Republic of China.*

<sup>c</sup> *Crystal Pharmatech, Suzhou Industrial Park, Suzhou 215123, People's Republic of China.*

---

\*Corresponding author:

Tel: +86-512-62872713, Fax: +86-512-62603079, E-mail: hlzhang2008@sinano.ac.cn.

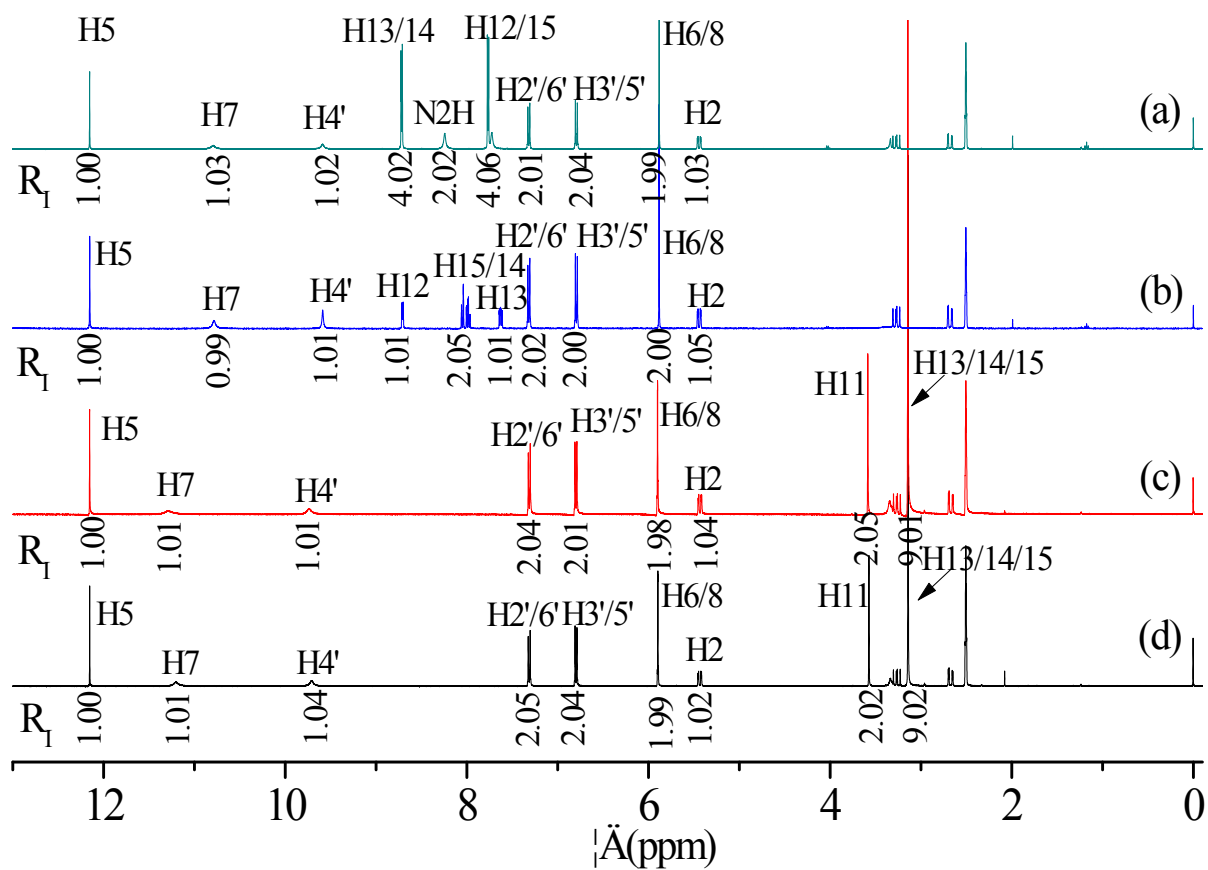

**Fig. S1.**  $^1\text{H}$  NMR spectra of (a) NAR-INM, (b) NAR-PCA, (c) NAR-BTN form A, (d) NAR-BTN form B. RI: relative integrals of the  $^1\text{H}$  signals.

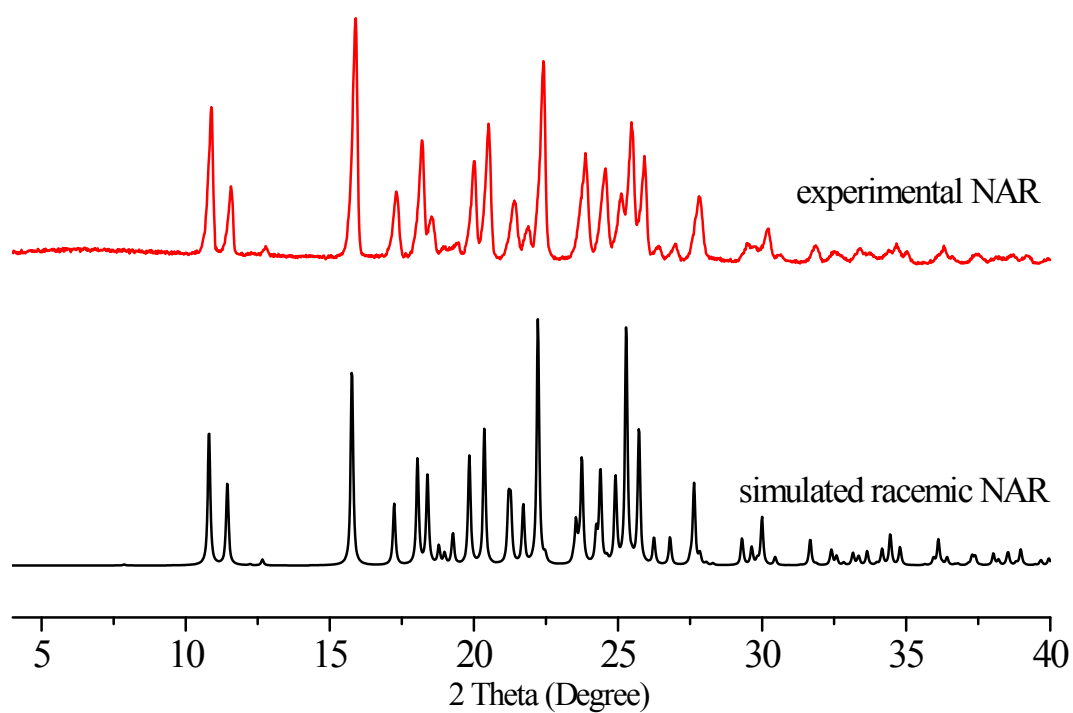

**Fig. S2.** Powder XRD patterns of experimental material and simulated racemic crystal form (CCDC: 1143928) of NAR.

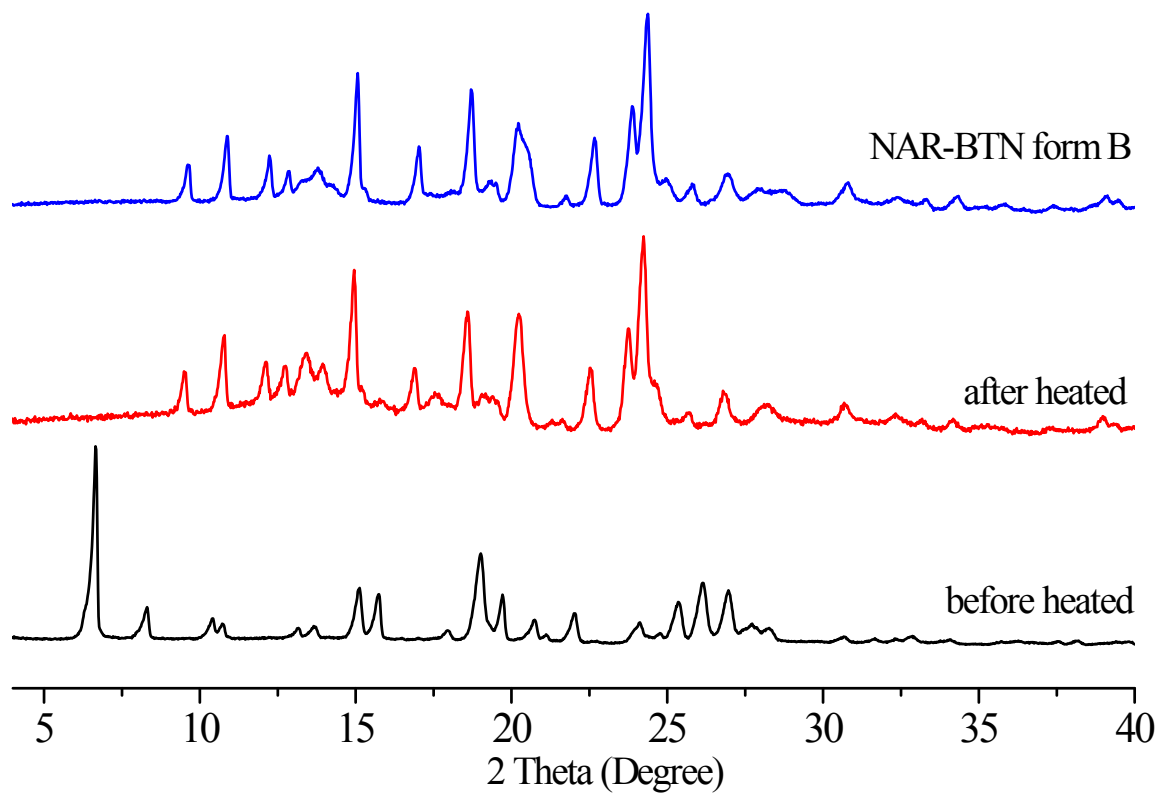

**Fig. S3.** Powder XRD patterns of NAR-BTN form A before and after heated (155 °C, 5 minutes).

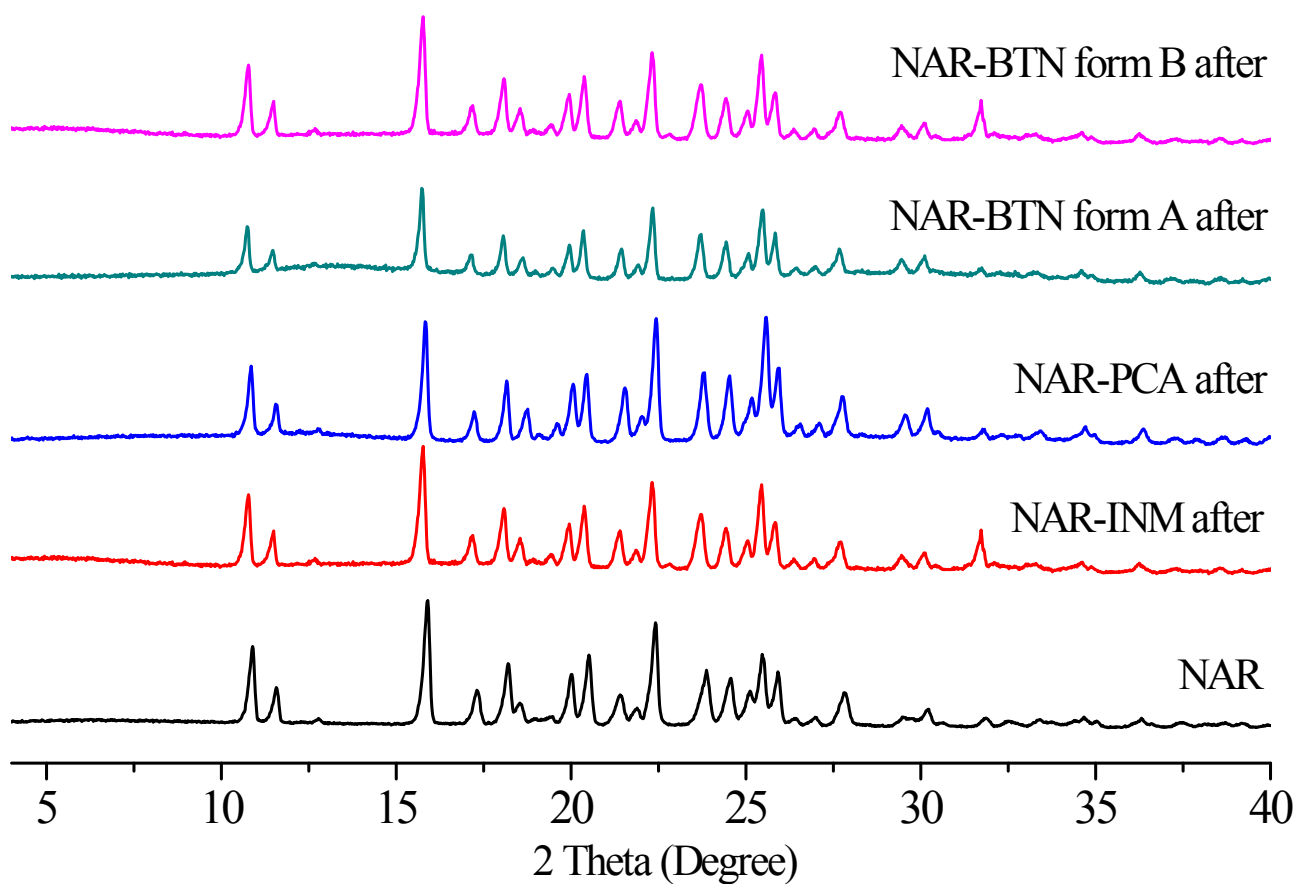

**Fig. S4.** Powder XRD patterns of NAR-INM, NAR-PCA, NAR-BTN form A and NAR-BTN form B after dissolution experiments.
